# Supplementary material
Source: PubMed Central journal article supplement (PMC4296193)
Supplement: supp_dju354_jnci_JNCI_14_0377_s01.pdf [file supp_dju354_jnci_JNCI_14_0377_s01.pdf]

| <b>Supplementary Table 1.</b> Risk-benefit index and 5-year discontinuation according to calendar year of tamoxifen initiation. |                                              |                  |                  |                  |                  |                  |
|---------------------------------------------------------------------------------------------------------------------------------|----------------------------------------------|------------------|------------------|------------------|------------------|------------------|
|                                                                                                                                 | <b>Calendar year of tamoxifen initiation</b> |                  |                  |                  |                  |                  |
|                                                                                                                                 | <b>Overall</b>                               | <b>1986-1997</b> | <b>1998-2001</b> | <b>2002-2005</b> | <b>2006-2009</b> | <b>1998-2009</b> |
| <b>Total N</b>                                                                                                                  | 788                                          | 97               | 327              | 296              | 68               | 691              |
| <b>Risk Benefit Index</b>                                                                                                       |                                              |                  |                  |                  |                  |                  |
| No evidence of benefit                                                                                                          | 20.0%                                        | 8.2%             | 15.9%            | 27.4%            | 25.0%            | 21.7%            |
| Moderate evidence of benefit                                                                                                    | 12.4%                                        | 7.2%             | 11.9%            | 13.9%            | 16.2%            | 13.2%            |
| Strong evidence of benefit                                                                                                      | 61.7%                                        | 77.3%            | 68.5%            | 51.4%            | 51.5%            | 59.5%            |
| Not calculated                                                                                                                  | 5.8%                                         | 7.2%             | 3.7%             | 7.4%             | 7.4%             | 5.6%             |
| <b>5-year discontinuation</b>                                                                                                   | 46%                                          | 52%              | 41%              | 49%              | (41% at 3-years) | 45%              |

**Supplementary Figure 1.** Percent of current tamoxifen users with a risk-benefit index [16, 20] indicating no, moderate, or strong evidence that the benefits of tamoxifen for the primary prevention of breast cancer and fracture exceed the risk of serious side effects (i.e. endometrial cancer, stroke, pulmonary embolism, deep vein thrombosis, and cataract). Percentages are shown among all current tamoxifen users and according to hysterectomy status, race, and age at tamoxifen initiation.

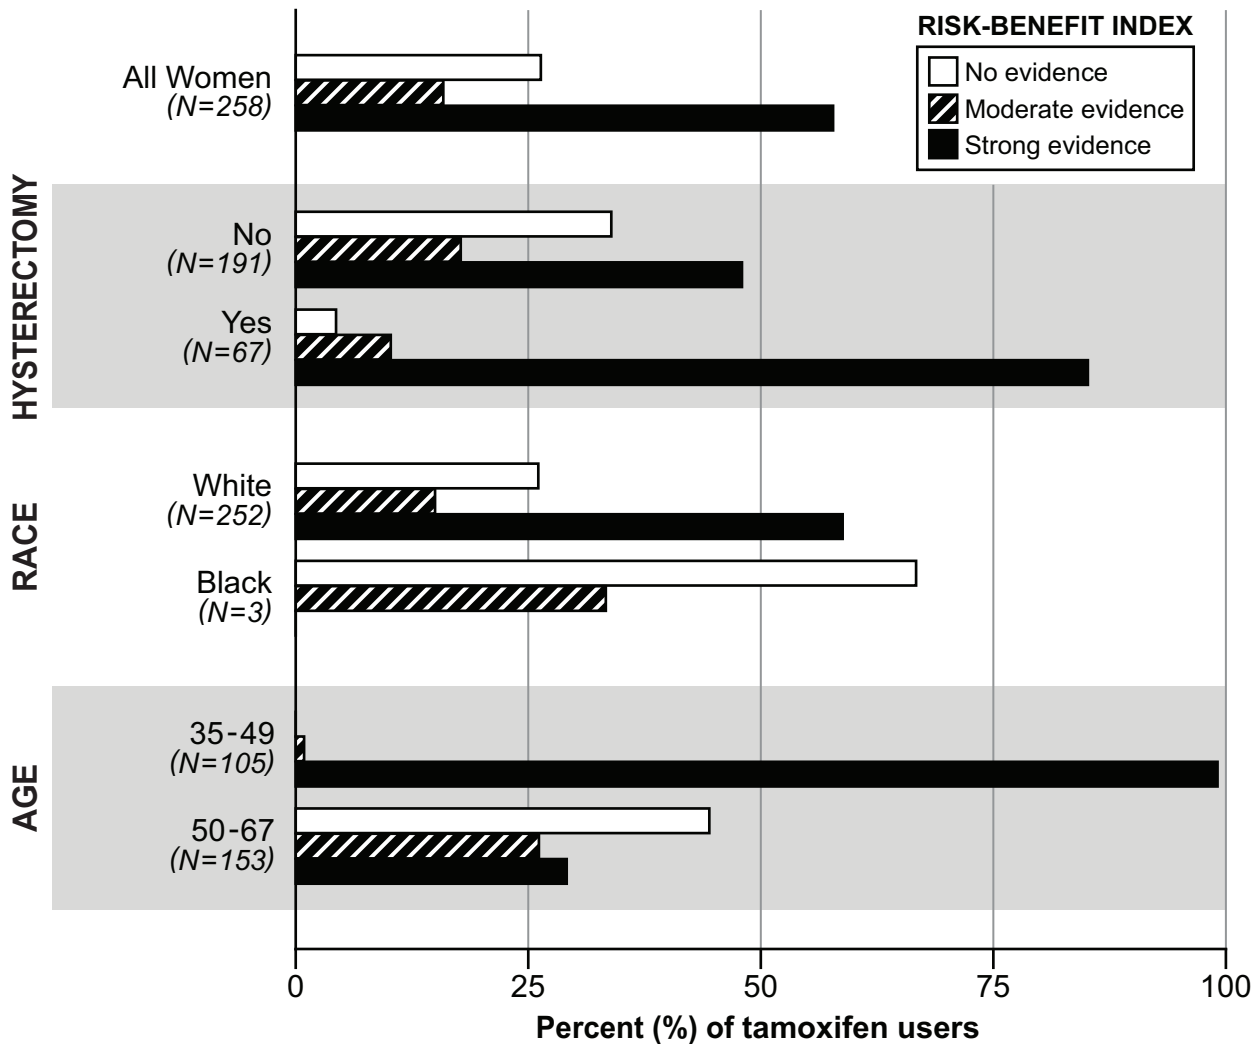

**Supplementary Figure 2.** Odds of tamoxifen use for breast cancer prevention according to the 5-year probability of developing invasive breast cancer at Sister Study enrollment among all tamoxifen users (N=788); women who started tamoxifen within 5 years of enrollment (N=363); or within 2 years of enrollment (N=120) relative to a comparison group of non-users matched ~4:1 on age and enrollment year.

**TIME FROM**

**TAMOXIFEN INITIATION  
TO STUDY ENROLLMENT**

**BCRAT  
SCORE**

**<1.67**

All

<5 years

<2 years

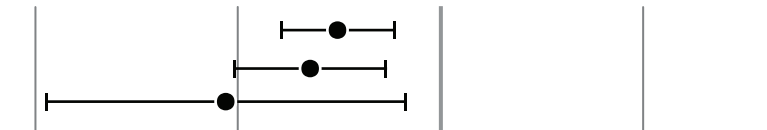

**1.67-2.99**

All

<5 years

<2 years

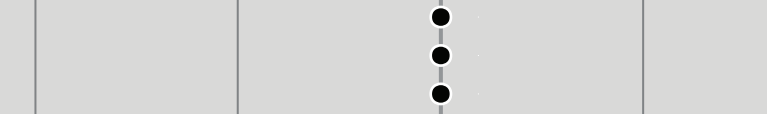

**3.00-5.99**

All

<5 years

<2 years

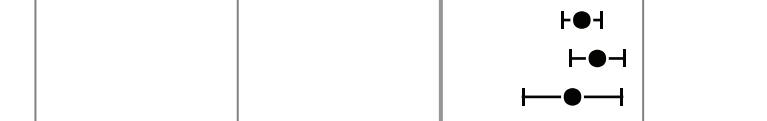

**≥6.00**

All

<5 years

<2 years

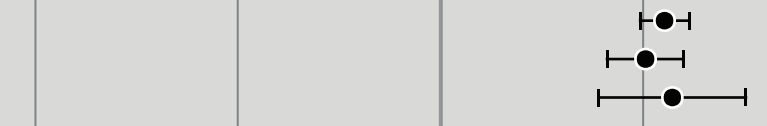

0.01

0.1

1

10

40

**Odds ratio and 95% CI  
for tamoxifen use**
